# Supplementary material for: Five Silkworm 30K Proteins Are Involved in the Cellular Immunity against Fungi
Source: MDPI journal article supplement (doi:10.3390/insects12020107), 2021-01-27
Supplement: s1 [file s1]

**Figure S1**

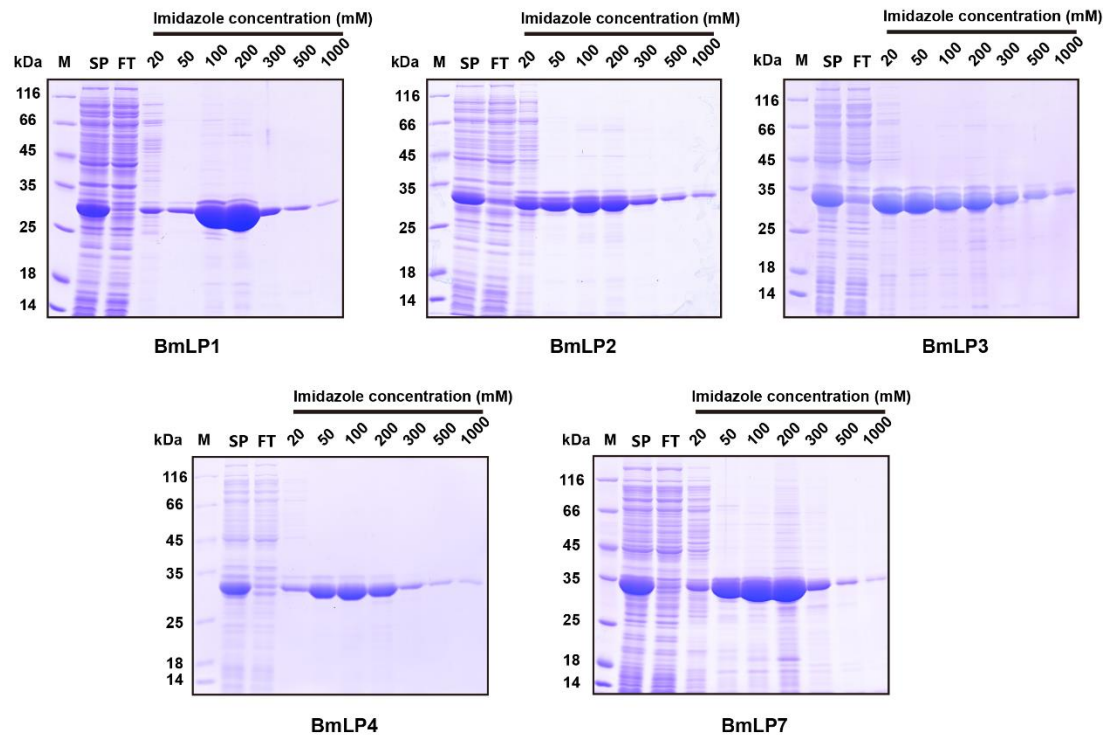

**Figure S1.** Recombinant 30K proteins were purified by NTA agarose affinity chromatography with a stepwise imidazole gradient. M: molecular weight marker; SP: soluble protein; FT: flow-through fraction.

**Figure S2**

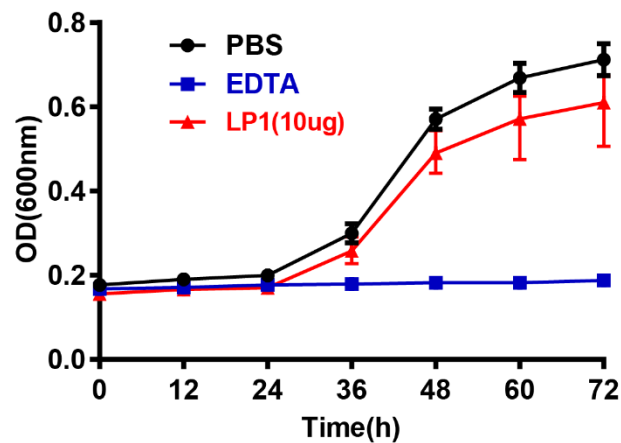

**Figure S2.** Antifungal activity of BmLP1 was performed by detecting the growth curve. 96-well plates were filled with 300 $\mu$ L of potato liquid medium containing 10 $\mu$ g BmLP1 and *Candida albicans* at a final concentration of  $1 \times 10^5$  cells. 96-well plates were incubated at 30  $^{\circ}$ C, and fungal growth was observed

by monitoring the absorbance at 600 nm after culturing for 0, 12, 24, 36, and 48 h. Vertical bars represent the mean  $\pm$  SE (n = 3).

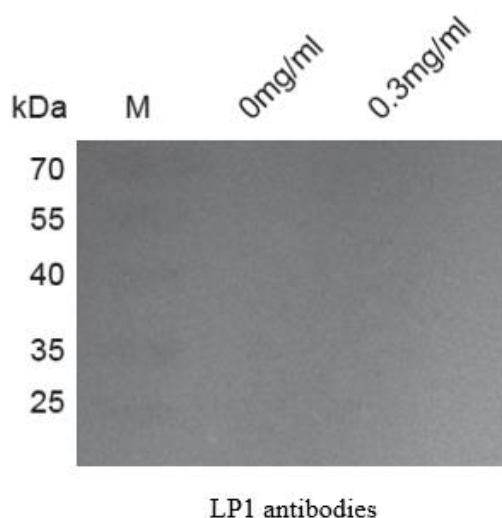

**Figure S3.** Binding of BmLP1 to Hela cells revealed using western blotting. 0.3mg/ml concentrations of purified proteins in DMEM medium were incubated with Hela cells for 2 h at room temperature, washed four times with PBS after trypsin digestion, and Hela cell proteins were extracted using RIPA. BmLP1 was detected using BmLP1 specific polyclonal antibodies.

**Table S1.** Primers used in this study. F: Forward primer; R: Reverse primer; The BmlpX-F/R for protein expression; The BmlpX qPCR-F/R for RT-qPCR.

| Primers             | Sequence (5'-3')                    |
|---------------------|-------------------------------------|
| <i>Bmlp1</i> -F     | TACTTCCAATCCATGACACTTGCACCAAGAACTGA |
| <i>Bmlp1</i> -R     | TATCCACCTTTACTGTTAGTAGGGGACGATGTACC |
| <i>Bmlp2</i> -F     | TACTTCCAATCCATGGGCGTCGTGGAACATATCC  |
| <i>Bmlp2</i> -R     | TATCCACCTTTACTGTTAGAAAGGTGTAATGAACC |
| <i>Bmlp3</i> -F     | TACTTCCAATCCATGGACGTCCCTAACGACATTCT |
| <i>Bmlp3</i> -R     | TATCCACCTTTACTGTTAGAAAGCCTTTATACCCC |
| <i>Bmlp4</i> -F     | TACTTCCAATCCATGGGCGTCACTGAAATGTCCG  |
| <i>Bmlp4</i> -R     | TATCCACCTTTACTGCTAGAAAGGTGTAACGAACC |
| <i>Bmlp7</i> -F     | TACTTCCAATCCATGGCAGATTCCGACGTCCCT   |
| <i>Bmlp7</i> -R     | TATCCACCTTTACTGTTAAAATGCCTTAACACCCC |
| <i>Bmlp1</i> qPCR-F | TGTTATCGAGCTTCAGGT                  |
| <i>Bmlp1</i> qPCR-R | CCCCATCCAGTTTAGAG                   |
| <i>Bmlp2</i> qPCR-F | AGCACCAGGGAGCAAT                    |
| <i>Bmlp2</i> qPCR-R | TCACCGTCGTGTCCAA                    |
| <i>Bmlp3</i> qPCR-F | GAGGAGAAGAAGAGCGAAGT                |
| <i>Bmlp3</i> qPCR-R | GCCCTGGAGCCAAAGT                    |
| <i>Bmlp4</i> qPCR-F | ACACCACCAGGGAGCA                    |
| <i>Bmlp4</i> qPCR-R | TGTAACGAACCAGGAGAAG                 |
| <i>Bmlp7</i> qPCR-F | GGAGAAGAAGAGCGAAGT                  |
| <i>Bmlp7</i> qPCR-R | TGGAGCCAAAGTTGATAG                  |
